# Supplementary material for: Novel Broad-Spectrum Antiviral Inhibitors Targeting Host Factors Essential for Replication of Pathogenic RNA Viruses
Source: MDPI journal article supplement (doi:10.3390/v12121423), 2020-12-10

**Figure 3d**  
Anti OGG1  
Anti SOD1

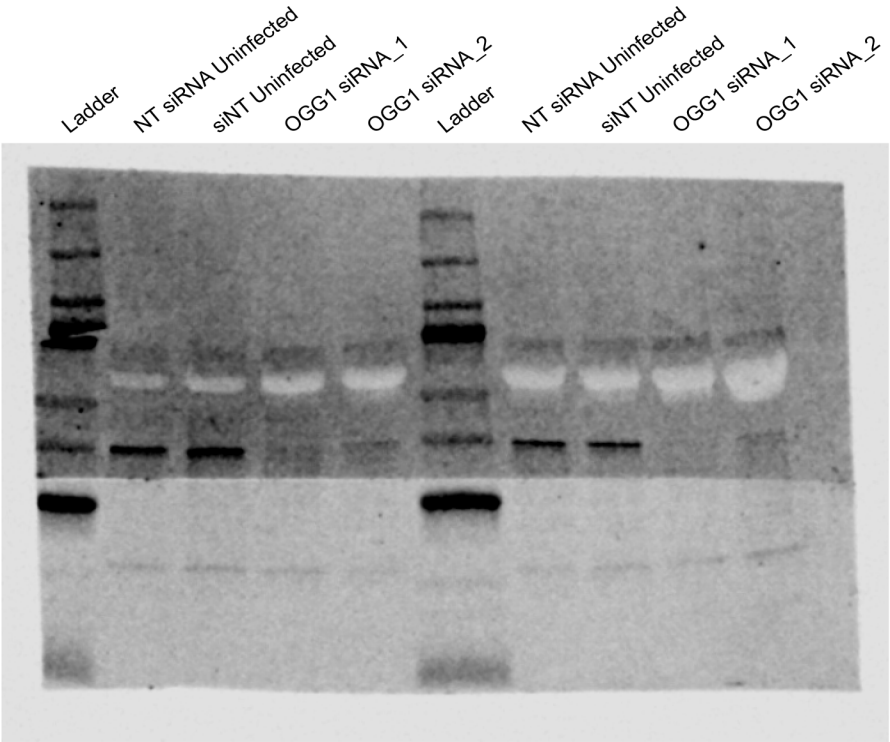

Anti OGG1

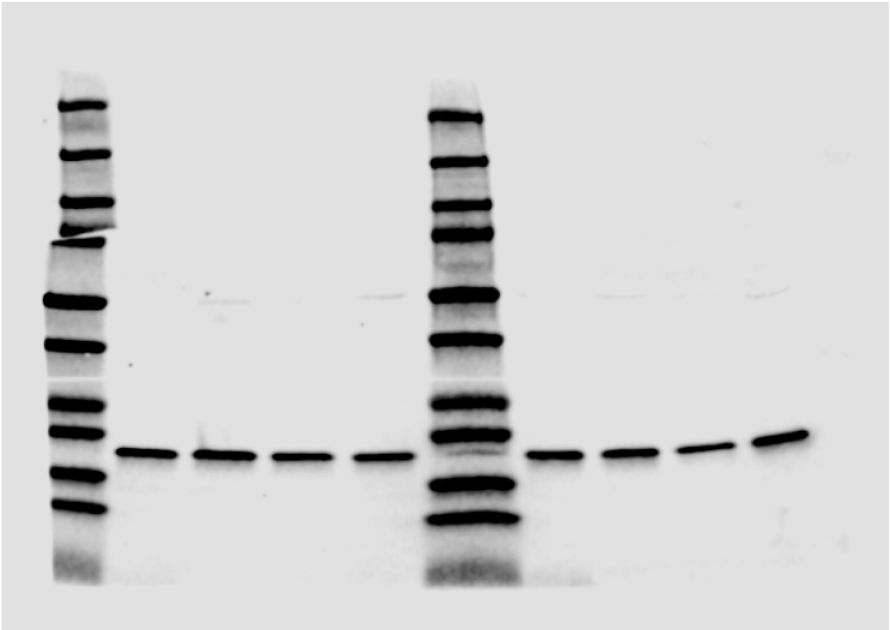

Anti SOD1

**Figure 6a**  
Anti Hsp70  
Anti Actin

TH6744                    37 °C                    47 °C                    52 °C                    59 °C  
                                 DMSO 1 3 10 30                    DMSO 1 3 10 30                    DMSO 1 3 10 30                    DMSO 1 3 10 30

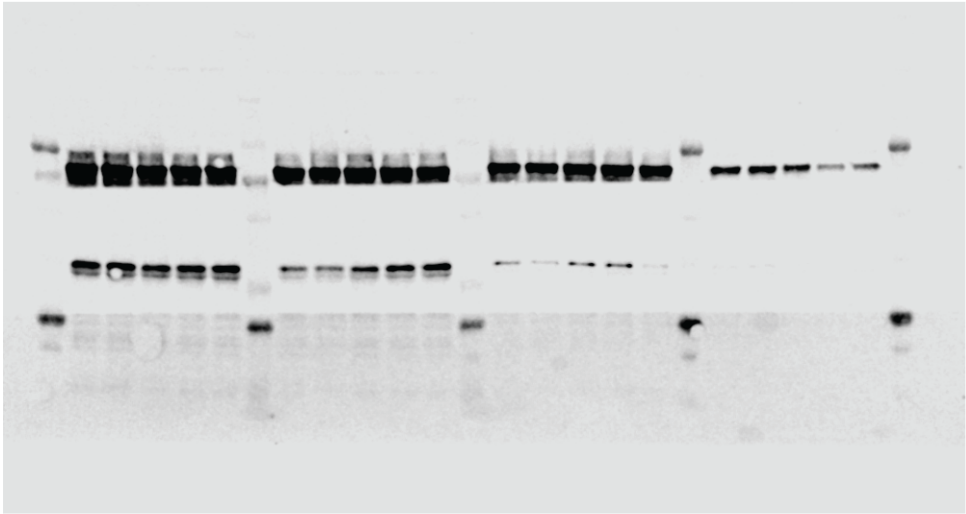

Anti Hsp70                    \*Anti OGG1

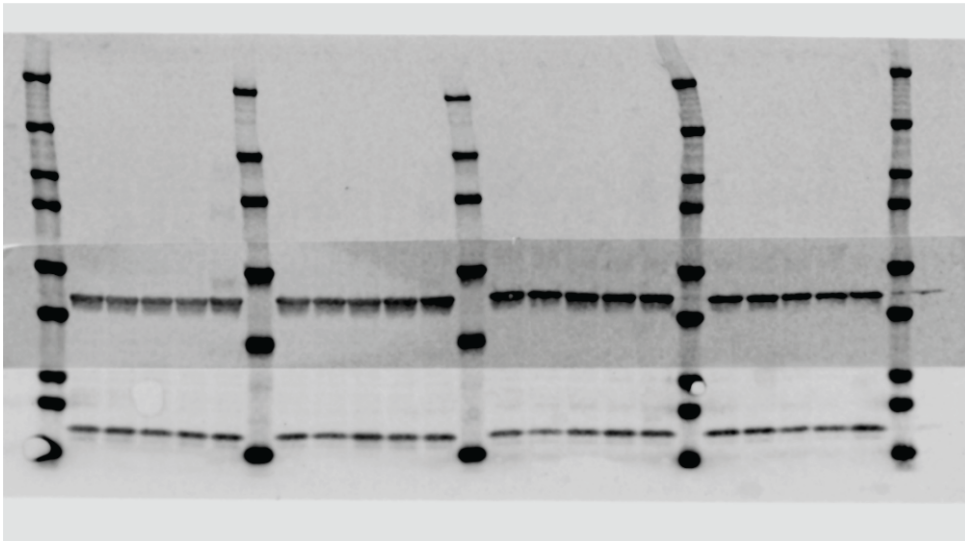

Anti Actin                    \*Anti SOD1

**Figure 6b**

Anti Hsp70  
Anti HAZV NP

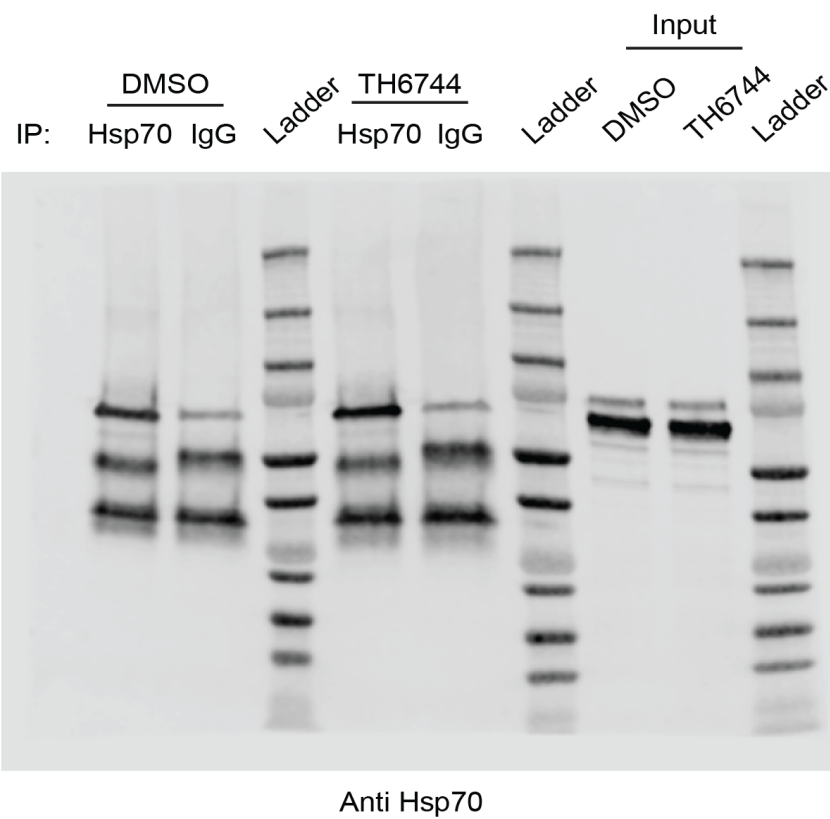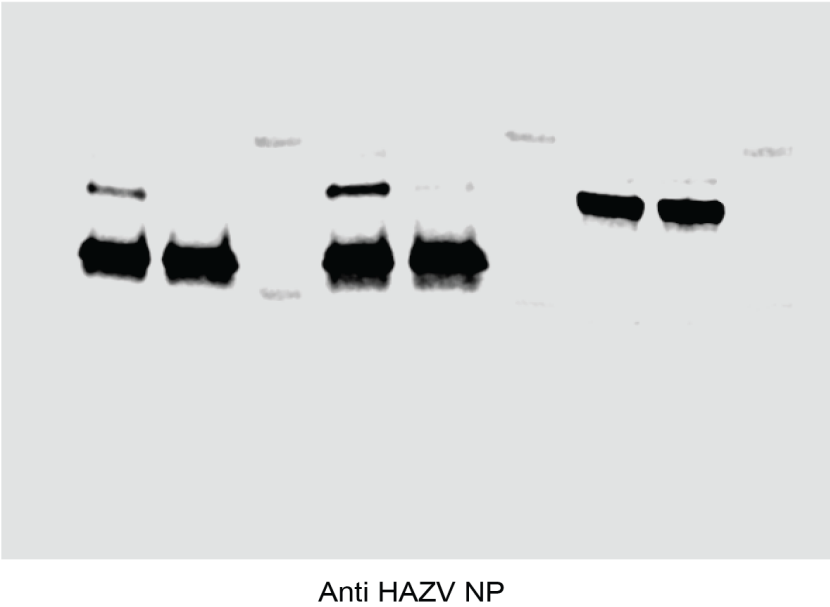

**Figure S3a**  
Anti OGG1  
Anti Actin

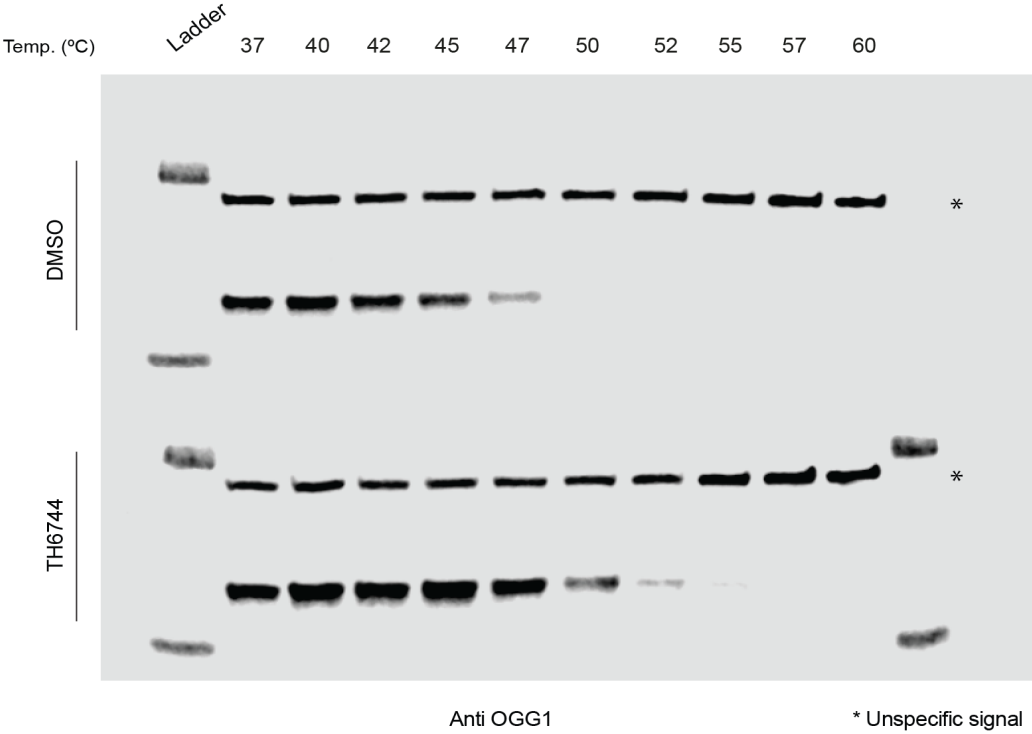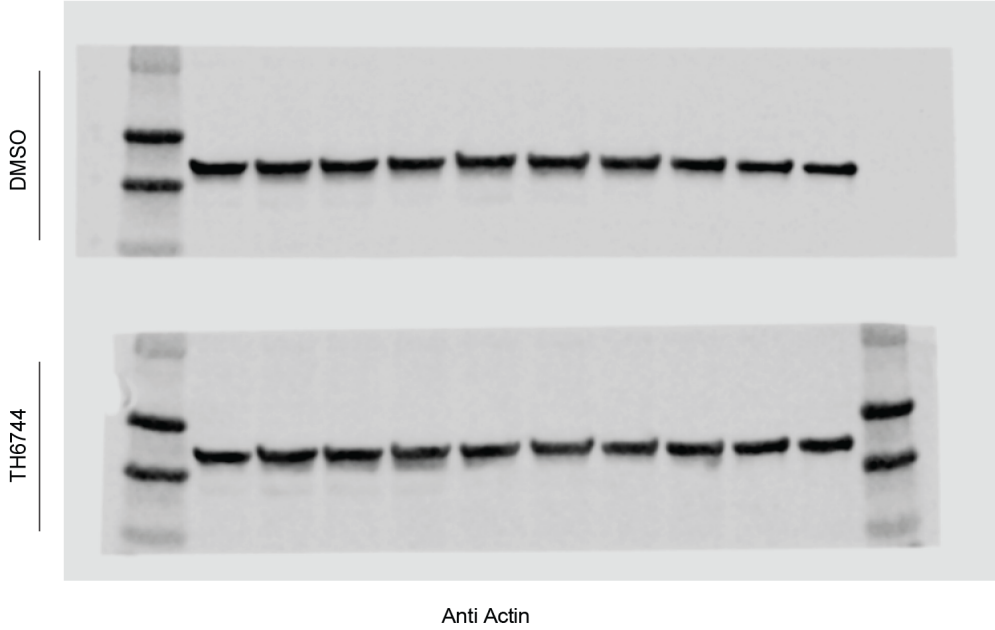

**Figure S3h**  
Anti OGG1  
Anti SOD1

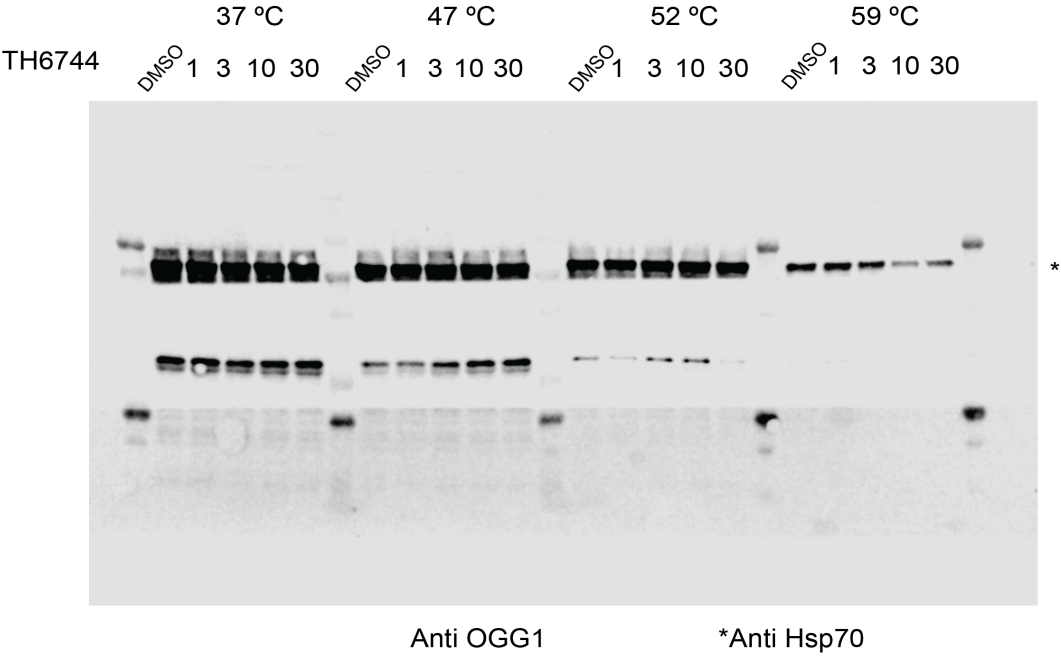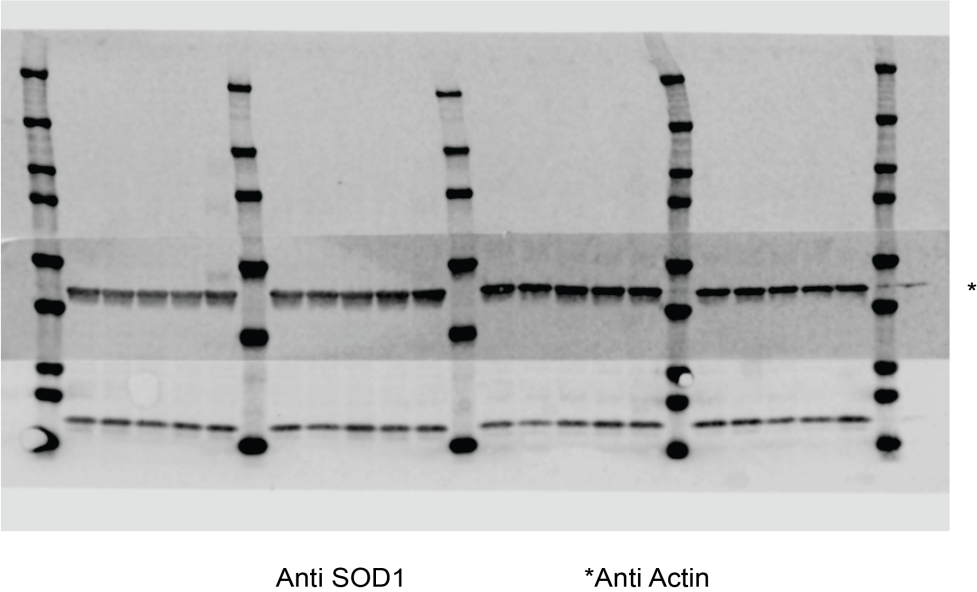

**Figure S5a**  
Anti Hsp70  
Anti SOD1

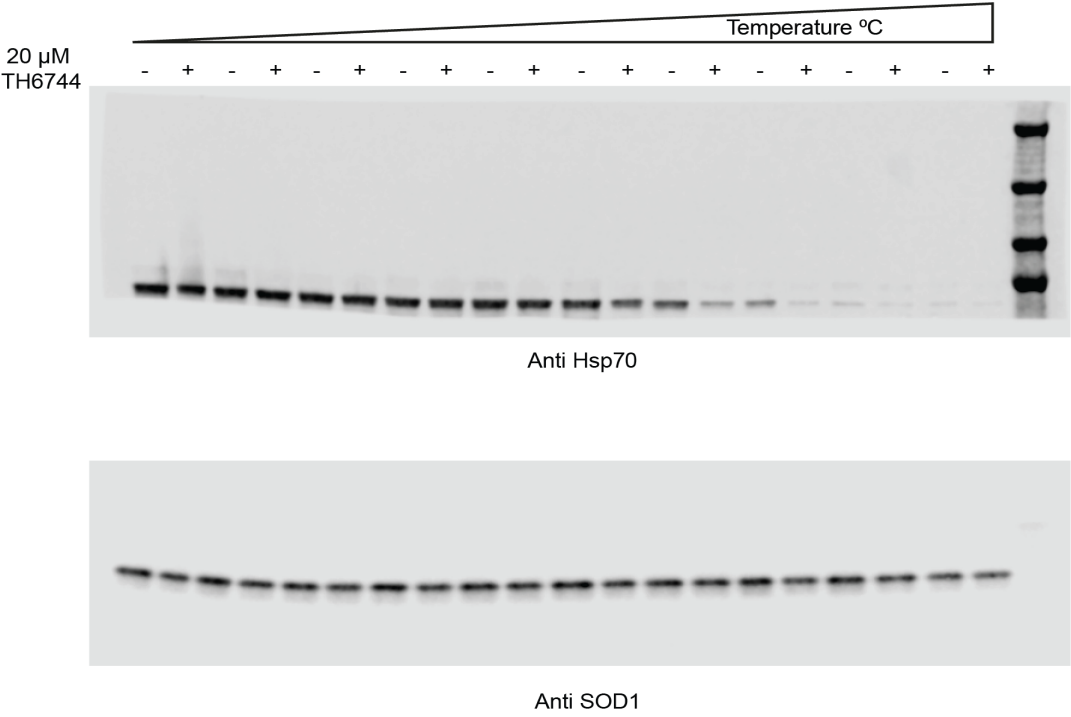

**Figure S5b**  
Anti Hsp70  
Anti SOD1

|                |    |   |    |   |    |   |    |   |    |   |    |   |    |   |    |   |    |   |    |   |  |
|----------------|----|---|----|---|----|---|----|---|----|---|----|---|----|---|----|---|----|---|----|---|--|
| Temperature °C | 37 |   | 41 |   | 44 |   | 47 |   | 50 |   | 53 |   | 56 |   | 59 |   | 63 |   | 67 |   |  |
| Treatment      | -  | + | -  | + | -  | + | -  | + | -  | + | -  | + | -  | + | -  | + | -  | + | -  | + |  |

Treatment: "-" DMSO; "+" 20  $\mu$ M TH6744

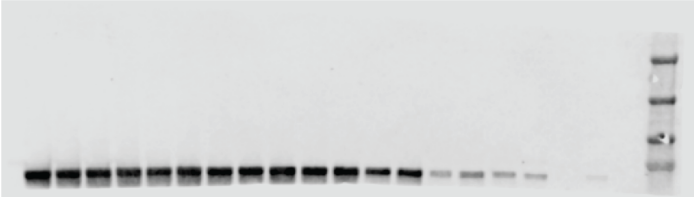

Anti Hsp70

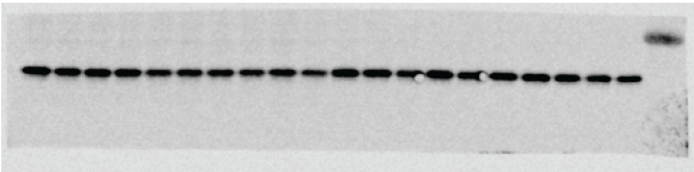

Anti SOD-1

**Figure S5c**  
Anti Hsp70  
Anti SOD1

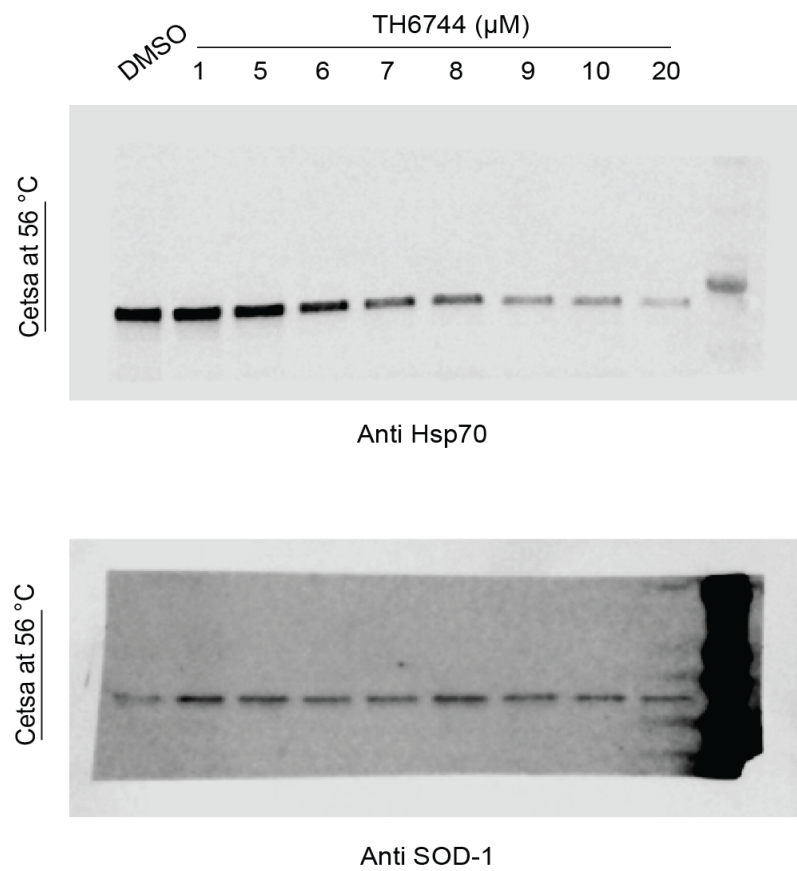

Supplement: s1 [file s1]
